# Supplementary material for: Developing a core outcome set on traditional Chinese medicine (COS-TCM) for chronic heart failure (CHF): a study protocol
Source: HighWire-hosted journal article supplement (doi:10.1136/bmjopen-2020-047148), 2021-07-01
Supplement: bmjopen-2020-047148supp001_data_supplement.pdf [file bmjopen-2020-047148supp001_data_supplement.pdf]

**Supplementary File 1**

#1 "chronic"[All Fields] OR "chronical"[All Fields] OR "chronically"[All Fields] OR "chronicities"[All Fields] OR "chronicity"[All Fields] OR "chronicization"[All Fields] OR "chronics"[All Fields] AND "heart failure"[MeSH Terms] OR "heart failure"[Title/Abstract] OR "cardiac failure"[Title/Abstract] OR "myocardial failure"[Title/Abstract] OR "cardiomyopath\*"[Title/Abstract] OR "cardio renal syndrome"[Title/Abstract] OR "dyspnea paroxysmal"[Title/Abstract] OR "edema cardiac"[Title/Abstract] OR "heart failure diastolic"[Title/Abstract] OR "heart failure systolic"[Title/Abstract] OR "heart decompensation"[Title/Abstract] OR "decompensation heart"[Title/Abstract] OR "heart failure right sided"[Title/Abstract] OR "heart failure right sided"[Title/Abstract] OR "right sided heart failure"[Title/Abstract] OR "right sided heart failure"[Title/Abstract] OR "congestive heart failure"[Title/Abstract] OR "heart failure congestive"[Title/Abstract] OR "heart failure left sided"[Title/Abstract] OR "heart failure left sided"[Title/Abstract] OR "left sided heart failure"[Title/Abstract] OR "left sided heart failure"[Title/Abstract]

#2 "medicine, chinese traditional"[MeSH Terms] OR "chinese medicine"[Title/Abstract] OR "traditional chinese medicine"[Title/Abstract] OR "herbal medicine"[Title/Abstract] OR "chinese traditional"[Title/Abstract] OR "chinese herbal"[Title/Abstract] OR "oriental traditional"[Title/Abstract] OR "herb"[Title/Abstract] OR "herbs"[Title/Abstract] OR "Herbal"[Title/Abstract] OR "herbals"[Title/Abstract] OR "TCM"[Title/Abstract]

#3 "Acupuncture"[MeSH Terms] OR "acupuncture therapy"[MeSH Terms] OR "acupuncture treatment\*"[Title/Abstract] OR "treatment acupuncture"[Title/Abstract] OR "therapy acupuncture"[Title/Abstract] OR "pharmacopuncture treatment"[Title/Abstract] OR (((((((("therapeutics"[MeSH Terms] OR "therapeutics"[All Fields]) OR "treatments"[All Fields]) OR "Therapy"[MeSH Subheading]) OR "Therapy"[All Fields]) OR "Treatment"[All Fields]) OR "treatment s"[All Fields]) AND "Pharmacopuncture"[Title/Abstract])) OR "pharmacopuncture therapy"[Title/Abstract]

#4 #2 OR #3 (((((((((((("medicine, chinese traditional"[MeSH Terms] OR "chinese medicine"[Title/Abstract]) OR "traditional chinese medicine"[Title/Abstract]) OR "herbal medicine"[Title/Abstract]) OR "chinese traditional"[Title/Abstract]) OR "chinese herbal"[Title/Abstract]) OR "oriental traditional"[Title/Abstract]) OR "herb"[Title/Abstract]) OR "herbs"[Title/Abstract]) OR "Herbal"[Title/Abstract]) OR "herbals"[Title/Abstract]) OR "TCM"[Title/Abstract]) OR (((((((("Acupuncture"[MeSH Terms] OR "acupuncture therapy"[MeSH Terms] OR "acupuncture treatment\*"[Title/Abstract] OR "treatment acupuncture"[Title/Abstract] OR "therapy acupuncture"[Title/Abstract] OR "pharmacopuncture treatment"[Title/Abstract] OR (((((((("therapeutics"[MeSH Terms] OR "therapeutics"[All Fields]) OR "treatments"[All Fields]) OR "Therapy"[MeSH Subheading]) OR "Therapy"[All Fields]) OR "Treatment"[All Fields]) OR "treatment s"[All Fields]) AND "Pharmacopuncture"[Title/Abstract])) OR "pharmacopuncture therapy"[Title/Abstract]) AND "randomized controlled trial"[Publication Type])

#5 #1 AND #4 (((((((((((((((((((((((("chronic"[All Fields] OR "chronical"[All Fields]) OR "chronically"[All Fields]) OR "chronicities"[All Fields]) OR "chronicity"[All Fields]) OR

"chronicization"[All Fields]) OR "chronics"[All Fields]) AND "heart failure"[MeSH Terms]) OR "heart failure"[Title/Abstract]) OR "cardiac failure"[Title/Abstract]) OR "myocardial failure"[Title/Abstract]) OR "cardiomyopath\*"[Title/Abstract]) OR "cardio renal syndrome"[Title/Abstract]) OR "dyspnea paroxysmal"[Title/Abstract]) OR "edema cardiac"[Title/Abstract]) OR "heart failure diastolic"[Title/Abstract]) OR "heart failure systolic"[Title/Abstract]) OR "heart decompensation"[Title/Abstract]) OR "decompensation heart"[Title/Abstract]) OR "heart failure right sided"[Title/Abstract]) OR "heart failure right sided"[Title/Abstract]) OR "right sided heart failure"[Title/Abstract]) OR "right sided heart failure"[Title/Abstract]) OR "congestive heart failure"[Title/Abstract]) OR "heart failure congestive"[Title/Abstract]) OR "heart failure left sided"[Title/Abstract]) OR "heart failure left sided"[Title/Abstract]) OR "left sided heart failure"[Title/Abstract]) OR "left sided heart failure"[Title/Abstract]) AND (((((((("medicine, chinese traditional"[MeSH Terms] OR "chinese medicine"[Title/Abstract]) OR "traditional chinese medicine"[Title/Abstract]) OR "herbal medicine"[Title/Abstract]) OR "chinese traditional"[Title/Abstract]) OR "chinese herbal"[Title/Abstract]) OR "oriental traditional"[Title/Abstract]) OR "herb"[Title/Abstract]) OR "herbs"[Title/Abstract]) OR "Herbal"[Title/Abstract]) OR "herbals"[Title/Abstract]) OR "TCM"[Title/Abstract])) AND (((((((("medicine, chinese traditional"[MeSH Terms] OR "chinese medicine"[Title/Abstract]) OR "traditional chinese medicine"[Title/Abstract]) OR "herbal medicine"[Title/Abstract]) OR "chinese traditional"[Title/Abstract]) OR "chinese herbal"[Title/Abstract]) OR "oriental traditional"[Title/Abstract]) OR "herb"[Title/Abstract]) OR "herbs"[Title/Abstract]) OR "Herbal"[Title/Abstract]) OR "herbals"[Title/Abstract]) OR "TCM"[Title/Abstract]) OR (((((((("Acupuncture"[MeSH Terms] OR "acupuncture therapy"[MeSH Terms] OR "acupuncture treatment\*"[Title/Abstract]) OR "treatment acupuncture"[Title/Abstract]) OR "therapy acupuncture"[Title/Abstract]) OR "pharmacoacupuncture treatment"[Title/Abstract]) OR (((((((("therapeutics"[MeSH Terms] OR "therapeutics"[All Fields]) OR "treatments"[All Fields]) OR "Therapy"[MeSH Subheading]) OR "Therapy"[All Fields]) OR "Treatment"[All Fields]) OR "treatment s"[All Fields]) AND "Pharmacoacupuncture"[Title/Abstract])) OR "pharmacoacupuncture therapy"[Title/Abstract]) AND "randomized controlled trial"[Publication Type]))
